# Supplementary material for: Modulation of the Catalytic Properties of Lipase B from Candida antarctica by Immobilization on Tailor-Made Magnetic Iron Oxide Nanoparticles: The Key Role of Nanocarrier Surface Engineering
Source: MDPI journal article supplement (doi:10.3390/polym10060615), 2018-06-05
Supplement: s1 [file s1]

## **Supplementary Materials**

### **Modulation Of The Catalytic Properties Of Lipase B From *Candida Antarctica* By Immobilization On Tailor-Made Magnetic Iron Oxide Nanoparticles: The Key Role Of Nanocarrier Surface Engineering.**

*Mario Viñambres,<sup>1</sup> Marco Filice,<sup>2,3,4\*</sup> Marzia Marciello<sup>1\*</sup>*

<sup>1</sup> Department of Biomaterials and Bioinspired Material, Materials Science Institute of Madrid (ICMM-CSIC), Sor Juana Inés de la Cruz 3, Cantoblanco, Madrid, Spain

<sup>2</sup> Department of Chemistry in Pharmaceutical Sciences, Faculty of Pharmacy, Complutense University (UCM), Plaza Ramón y Cajal, 28040 Madrid (Spain)

<sup>3</sup> National Research Centre for Cardiovascular Disease (CNIC), C/Melchor Fernández-Almagro 3. 28029, Madrid, Spain.

<sup>4</sup> Biomedical Research Networking Center for Respiratory Diseases (CIBERES), C/Melchor Fernández-Almagro 3. 28029, Madrid, Spain.

\*Correspondence to: mfilice@ucm.es (MF); marziamarciello@gmail.com (MM)

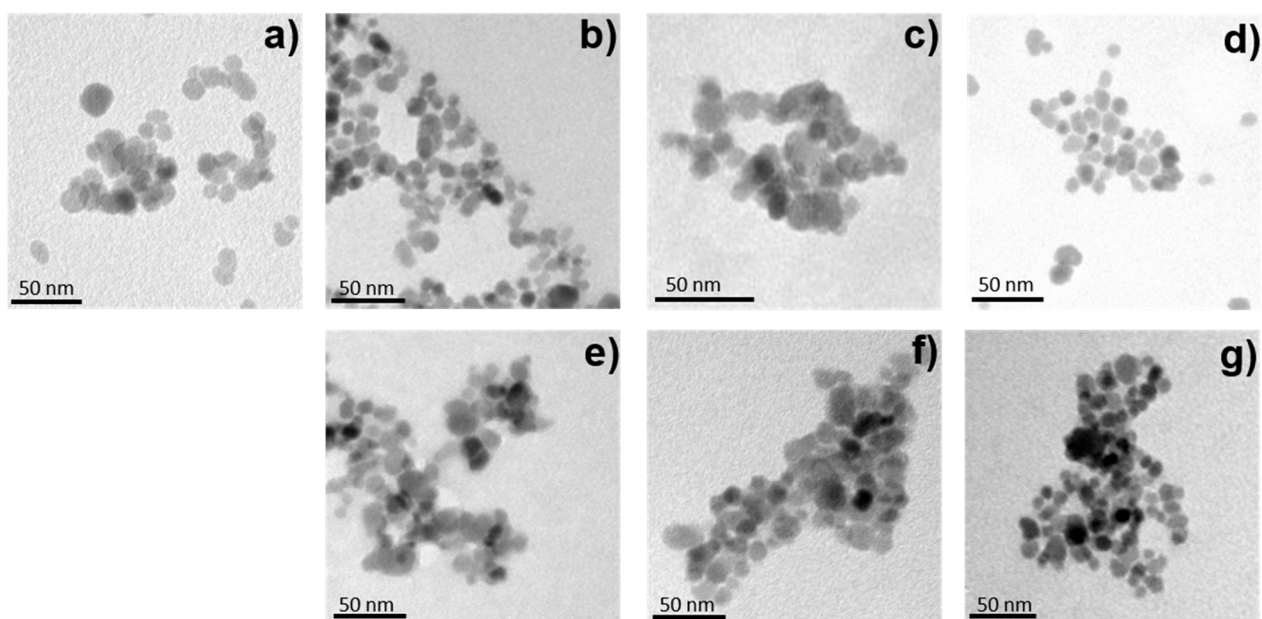

**Figure S1:** TEM micrographs of a) pristine nanoparticles, b) CA-coated NPs. c) SA-coated NPs. d) OA-coated NPs. e) CALBEDA@CA-NPs. f) CALBEDA@SA-NPs. g) CALBEDA@OA-NPs.

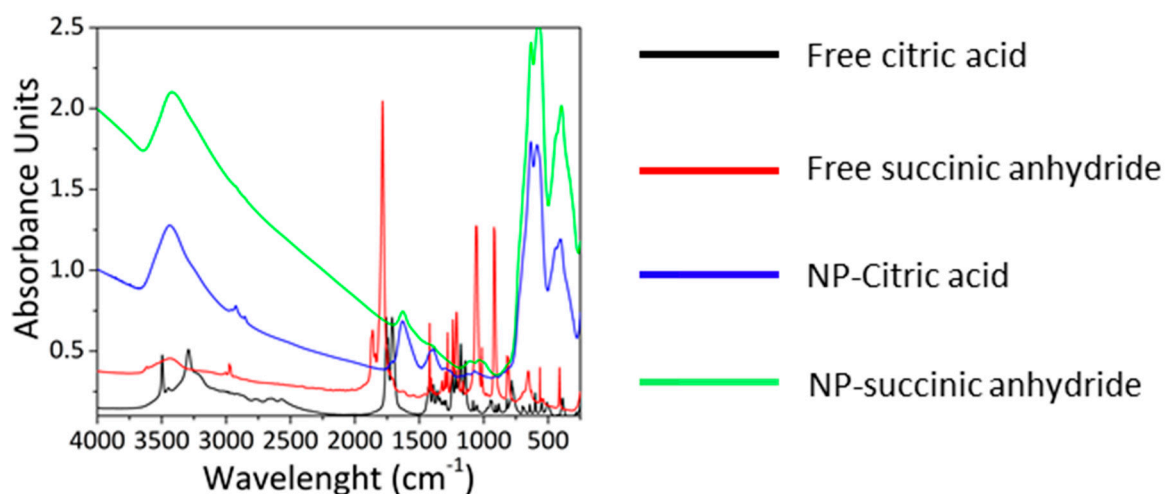

**Figure S2:** FTIR spectra of citric acid and succinic anhydride-coated NP compared to free citric acid and succinic anhydride molecules.

FTIR spectra of hydrophilic coated-NPs compared with the respective free molecules (citric acid and succinic anhydride) are reported in Figure S2. The peaks at around 1800-1700 cm<sup>-1</sup> in the free molecules, corresponding to asymmetric and symmetric COO<sup>-</sup> stretching, have been shifted to the right when conjugated to the NPs. The intensity of the peaks between 1500-750 cm<sup>-1</sup> was attenuated in the case of coated NPs due to the high amount of iron oxide nanoparticles respect to the mass of coating in the sample.

**Table S1.** Recyclability assessment of enzyme nanoderivatives.<sup>a</sup>

| Cycle | CALB <sub>EDA</sub> @CA-NPs                            |          | CALB <sub>EDA</sub> @SA-NPs                            |          | CALB <sub>EDA</sub> @OA-NPs                            |          |
|-------|--------------------------------------------------------|----------|--------------------------------------------------------|----------|--------------------------------------------------------|----------|
|       | Specific Activity (IU/mg <sub>lip</sub> ) <sup>b</sup> | <i>E</i> | Specific Activity (IU/mg <sub>lip</sub> ) <sup>b</sup> | <i>E</i> | Specific Activity (IU/mg <sub>lip</sub> ) <sup>b</sup> | <i>E</i> |
| 1     | 32                                                     | 27       | 34.6                                                   | 28       | 46.6                                                   | 9        |
| 2     | 30                                                     | 26.5     | 32.4                                                   | 27.5     | 40                                                     | 9        |
| 3     | 29.5                                                   | 26.7     | 31                                                     | 26.5     | 37                                                     | 8        |

<sup>a</sup> Hydrolysis of 2 mM methyl DL-mandelate (R,S-**1**) in MeCN-10 mM phosphate buffer, pH 7 (5:95) at 45°C.

<sup>b</sup> The specific activity is expressed as IU/mg of lipase immobilized on each support. IU =  $\mu$ mol of substrate hydrolyzed x minute x amount of lipase.
